# Supplementary material for: Modeling the cis-regulatory modules of genes expressed in developmental stages of Drosophila melanogaster
Source: PeerJ. 2017 May 30;5:e3389. doi: 10.7717/peerj.3389 (PMC5452948; doi:10.7717/peerj.3389)
Supplement: Table S3 [file peerj-05-3389-s004.xlsx]

## Sheet: Table S3
	Table S3. RNA-seq data and mapping information used to validate the models.
	SRA Accession Number	Developmental Stage	SRR Accession Number	All Reads	Filtered Reads	Mapped Reads	Mapping Percentage (%)
	SRS004668	Embryo 0-2h	SRR023663	8930944	7687627	7415032	96.45
			SRR023671	6188663	3982760	3846945	96.59
			SRR023747	5539197	3436654	3325132	96.75
	SRS004669	Embryo 2-4h	SRR023660	10471104	8124900	7827576	96.34
			SRR023705	8114694	4066616	3922753	96.46
	SRS004670	Embryo 4-6h	SRR023669	12133381	7473270	7220135	96.61
			SRR023696	13636630	9990044	9621979	96.32
			SRR023746	10802133	7479661	7162468	95.76
			SRR035220	14945372	9261822	8927681	96.39
	SRS004671	Embryo 6-8h	SRR023654	5517773	2845374	2714037	95.38
			SRR023668	8877158	7180281	6852578	95.44
			SRR023688	7571588	5072605	4832878	95.27
			SRR023691	6373860	5492127	5249353	95.58
			SRR023732	5670858	4961252	4750493	95.75
			SRR024217	13104009	11214817	10814242	96.43
	SRS004673	Embryo 10-12h	SRR023644	8331567	4205200	4041436	96.11
			SRR023694	12473853	8280402	7949256	96
			SRR024221	15326248	12574250	12173366	96.81
	SRS004674	Embryo 12-14h	SRR023643	14630216	10545717	10097962	95.75
			SRR023703	15588328	9644286	9239587	95.8
			SRR023724	11076419	7976862	7554412	94.7
			SRR035221	16717902	10872302	10427334	95.91
	SRS004675	Embryo 14-16h	SRR023725	12410958	9605410	9252890	96.33
			SRR023736	12128639	6686712	6439374	96.3
	SRS004676	Embryo 16-18h	SRR023715	11272157	8067093	7663303	94.99
			SRR023751	16801234	12518314	11982912	95.72
	SRS004677	Embryo 18-20h	SRR023682	6728748	959339	893011	93.09
			SRR023699	10321807	7274578	6802685	93.51
			SRR023700	12383606	8213692	7703524	93.79
			SRR024215	14686624	11819373	11137572	94.23
			SRR035222	13430086	8589237	8065187	93.9
	SRS004678	Embryo 20-22h	SRR023665	8810881	4550190	4289707	94.28
			SRR023728	10321041	7558126	7110381	94.08
	SRS004679	Embryo 22-24h	SRR023685	12830050	8522871	7992712	93.78
			SRR023733	17031788	8717933	8245164	94.58
	SRS004680	L1 stage larvae	SRR023646	14138011	8232165	7804785	94.81
			SRR023666	11383614	8204610	7781113	94.84
			SRR023706	14709650	7934090	7524306	94.84
	SRS004681	L2 stage larvae	SRR023670	10322623	6372154	5979507	93.84
			SRR023719	12213003	6577485	6166847	93.76
			SRR023761	14432042	7845609	7405371	94.39
			SRR035223	15904795	10515452	9912665	94.27
	SRS004682	L3 stage larvae	SRR023677	8110045	4871018	4468808	91.74
			SRR023760	10191798	7598205	6935251	91.27
			SRR023640	8067667	4586808	4178229	91.09
			SRR023758	6601787	4757020	4336041	91.15
	SRS004687		SRR023683	12223008	8681250	7992019	92.06
			SRR023692	6936600	4373121	4042146	92.43
			SRR023742	10006651	7381409	6788213	91.96
	SRS004867		SRR023729	13339961	8697013	8039453	92.44
			SRR023739	14685997	8800073	8133711	92.43
			SRR023782	16012322	10049211	9269200	92.24
			SRR023865	13495500	9825198	9065964	92.27
			SRR035219	16004759	9758846	9000532	92.23
	SRS004868	White prepupae	SRR023695	12047444	9141544	8721804	95.41
			SRR023704	12872762	8089004	7702387	95.22
			SRR023784	16798567	10353650	9847101	95.11
			SRR035217	13592775	7043897	6699882	95.12
	SRS004701	White prepupae + 12h	SRR023639	10135917	6332766	5903737	93.23
			SRR023716	12664266	9416027	8828095	93.76
	SRS004702	White prepupae + 24h	SRR023656	10440743	2829931	2653646	93.77
			SRR023708	15981163	9582816	9064725	94.59
			SRR023756	12183098	5096367	4797028	94.13
	SRS004869	Pupae	SRR023667	17519033	10655080	10014535	93.99
			SRR023721	15334033	10192865	9595752	94.14
			SRR023743	12485822	8758625	8277426	94.51
			SRR023785	17091318	13454203	12664754	94.13
	SRS004870		SRR023738	11746377	6714531	6306923	93.93
			SRR023744	12671586	9369284	8862322	94.59
			SRR023748	13727827	8301421	7808535	94.06
			SRR023783	17084467	12959961	12206101	94.18
			SRR024216	14400849	10783201	10213790	94.72
			SRR035218	16001196	8196488	7682467	93.73
	SRS004703		SRR023653	13885818	6977860	6650295	95.31
			SRR023723	11057089	7779898	7439023	95.62
			SRR023735	10038250	4652088	4381384	94.18
			SRR023740	13928424	8069339	7695741	95.37
	SRS004695	Adult male eclosion + 1 day	SRR023648	14340432	10812558	10170076	94.06
			SRR023664	11507656	6670552	6238601	93.52
			SRR023678	11985123	8609366	8119025	94.3
	SRS004696	Adult male eclosion + 5 days	SRR023642	3685640	932199	868176	93.13
			SRR023658	3825278	929459	865942	93.17
			SRR023672	13377413	3849304	3595458	93.41
	SRS004697	Adult male eclosion + 30 days	SRR023650	12687243	9044219	8557332	94.62
			SRR023698	11426485	3081321	2882924	93.56
			SRR023714	13727047	6543228	6165932	94.23
			SRR023752	10858848	4457672	4199143	94.2
			SRR024218	15935639	10921355	10369214	94.94
	SRS004689	Adult female eclosion + 1 day	SRR023662	14390197	8832266	8453291	95.71
			SRR023680	10051537	5123549	4840366	94.47
			SRR023702	11944159	10018027	9593288	95.76
			SRR023737	14577734	8978247	8595650	95.74
			SRR023828	12983189	8432518	8066201	95.66
			SRR024220	16195374	12933327	12432522	96.13
	SRS004693	Adult female eclosion + 5 days	SRR023651	8446970	3306652	3055248	92.4
			SRR023730	9086609	5148405	4768184	92.61
	SRS004692	Adult female eclosion + 30 days	SRR023674	6735408	4438362	4064590	91.58
			SRR023681	6430339	4134010	3780142	91.44
