# Supplementary material for: Modeling the cis-regulatory modules of genes expressed in developmental stages of Drosophila melanogaster
Source: PeerJ. 2017 May 30;5:e3389. doi: 10.7717/peerj.3389 (PMC5452948; doi:10.7717/peerj.3389)
Supplement: Table S5 [file peerj-05-3389-s006.xlsx]

## Sheet: Table S5
	Table S5. Summary of the comparisons between predicted and known motifs by Tomtom.
	Developmental Stage	Predicted Motif	Known Motif	P-Value	Consensus (Predicted Motif)	Consensus (Known Motif)	Orientation
	Embryo 0-2h	DM-12	dl	0.00120602	GTGTTTTCAG	GGGGTTTTTCCC	+
		M00044	sna	6.55107e-42	ACCACCTGTTTGCA	ACCACCTGTTTGCA	+
	Embryo 2-4h	DM-16	dl	0.00112949	CGAGAATCC	TGAGAAAATCC	+
	Embryo 4-6h	DM-5	Hsf	0.00127265	GAAGATAAAG	AGAAAAGAAAAGAAA	+
	Embryo 10-12h	DM-2	nub	0.00128694	TCATTTCCAT	CTAATTTGCATA	-
	Embryo 12-14h	DM-6	Cf2	0.000847696	TACAAATAT	TATATATAC	-
		M00266	croc	1.75162e-43	AAAAATAAATATAAGG	AAAAATAAATATAAGG	+
	Embryo 18-20h	DM-3	sna	0.00128057	TGGTGCTGGAG	CAGGTG	+
	Embryo 20-22h	DM-5	Pph13	0.00124886	ATAATT	CTAATTA	+
	Embryo 22-24h	DM-7	lbe	0.000963125	TTAAATAATTAT	TAGTTA	-
		DM-8	al	0.000983514	TATTATTTATT	TTAATTA	-
	L1 stage larvae	DM-1	hkb	0.000535394	GGTGGGCGTGGT	GGGGCGTGA	+
	L3 stage larvae	DM-4	Lim1	0.00118893	TTAATTT	TTAATTA	+
		M00266	croc	1.75162e-43	AAAAATAAATATAAGG	AAAAATAAATATAAGG	+
	White prepupae	DM-2	lbe	0.00100029	ATAATTATT	TAACTA	+
	White prepupae + 12h	DM-1	nub	0.000979114	ATTTGCAT	CTAATTTGCATA	-
	White prepupae + 24h	DM-4	lbe	0.00103715	TTGGTTA	TAGTTA	-
	Adult female eclosion + 5 days	DM-10	Kr	0.00126537	CCCATTC	TAACCCTTTTG	-
		M00710	zen	3.63395e-24	ACATTAAA	ACATTAAA	+
	Adult female eclosion + 30 days	DM-2	lbe	0.001017	AATTATTAAT	TAGTTA	-
		DM-4	ftz	0.000933847	AATTTATTTA	TAATTAA	-
		DM-5	Lim1	0.00057012	TTTATTTAT	TTAATTA	+
		M00266	croc	1.75162e-43	AAAAATAAATATAAGG	AAAAATAAATATAAGG	+
